# Supplementary material
Source: PubMed Central journal article supplement (PMC6298049)
Supplement: bty547_supplement.pdf [file bty547_supplement.pdf]

# Supplementary Materials

## emeraLD: Rapid LD Estimation with Massive Data Sets

Corbin Quick

- Here we describe subsampling techniques to approximate linkage disequilibrium (LD) between biallelic variants. We begin with the case where haplotype phase is known (genotypes take values 0 or 1), followed by the case where phase is unknown (genotypes take values 0, 1, or 2).
- We treat the sample correlation  $r = (p_{jk} - p_j p_k) / s_j s_k$  as a parameter to be estimated by subsampling. Here, minor allele frequencies  $p_j$  and  $p_k$  (and standard deviations  $s_j$  and  $s_k$ ) can be calculated efficiently and stored; because  $p_{jk}$  must be calculated for each pair of variants, we approximate to increase computational efficiency. For convenience, we treat allele frequencies as known constants.

### Informed Subsampling with Phased Genotypes

- Here, we describe a subsampling approach to approximate the sample correlation  $r = (p_{jk} - p_j p_k) / s_j s_k$  using phased genotypes. Consider the estimator  $\tilde{r}(\ell, \Delta) = [\tilde{p}_{jk}(\ell, \Delta) - p_j p_k] / s_j s_k$ , where

$$\tilde{p}_{jk}(\ell, \Delta) = \begin{cases} \frac{p_j}{\ell} \sum_{i=1}^{\ell} \tilde{G}_{ik}^{(j)} & \Delta = 1 \\ \frac{p_k}{\ell} \sum_{i=1}^{\ell} \tilde{G}_{ij}^{(k)} & \Delta = 0 \end{cases}$$

- for  $\Delta \in \{0, 1\}$  and where each  $\tilde{G}_{ik}^{(j)}$  (or  $\tilde{G}_{ij}^{(k)}$ ) is independently sampled from the subset of haplotypes with  $G_{ij} = 1$  (or  $G_{ik} = 1$ ).
- Clearly  $\tilde{r}(\ell, \Delta)$  is an unbiased estimator for  $r$ , and has empirical variance

$$\text{var}_n[\tilde{r}(\ell, \Delta)] = \frac{p_{jk}}{\ell s_j^2 s_k^2} [\Delta p_j^2 (p_j - p_{jk}) + (1 - \Delta) p_k^2 (p_k - p_{jk})].$$

- Therefore, given that we sample  $\ell$  minor allele carriers of either variant  $j$  or variant  $k$ , the optimal estimator  $\tilde{r}_\ell$  is given by taking  $\Delta = I(p_j \leq p_k)$ . Intuitively, carriers of the rarer allele are more informative for estimating the size of the intersection.
- Letting  $\rho$  denote the true LD value in the population, the MSE of the approximate estimator is

$$\text{MSE}(\tilde{r}_\ell) := \mathbb{E}[(\tilde{r}_\ell - \rho)^2] = \mathbb{E}[(r - \rho)^2] + \mathbb{E}[(\tilde{r}_\ell - r)^2],$$

- so for  $p_j \leq p_k$  (WLOG) we have  $\text{MSE}(\tilde{r}_\ell) - \text{MSE}(r) = (p_j - p_{jk}) p_{jk} / \ell s_j^2 s_k^2$ .
- The variance of the estimator is maximized with respect to  $p_{jk}$  when  $p_{jk} = p_j / 2$ , and maximized with respect to  $p_j$  when  $p_j = 1/2$  (because  $1/2 \geq s_k \geq s_j \geq p_j$ ). It follows that  $\text{MSE}(\tilde{r}_\ell) - \text{MSE}(r) \leq 1/\ell$ .

### Informed Subsampling with Unphased Genotypes

- Here, we describe a subsampling approach to approximate the sample correlation  $r = c_{jk} / s_j s_k$  using unphased genotypes. We define the sample covariance between variants  $j$  and  $k$  as  $c_{jk} = \frac{1}{n} \sum_{i=1}^n G_{ij} G_{ik} - 4p_j p_k$ , and we can write

$$\frac{1}{n} \sum_{i=1}^n G_{ij} G_{ik} = p_{k,1} \hat{\mathbb{E}}(G_j | G_k = 1) + 2p_{k,2} \hat{\mathbb{E}}(G_j | G_k = 2)$$

- where  $p_{k,m}$  is the proportion of individuals with genotype  $m$  at variant  $k$ , and  $\hat{\mathbb{E}}(G_j | G_k = m)$  is the mean genotype at variant  $j$  among individuals with genotype  $m$  at variant  $k$  in the overall sample of  $n$  individuals.

- Define the approximate estimator

$$\tilde{c}_{jk}(\ell_1, \ell_2) = p_{k,1}\tilde{\mathbb{E}}_{\ell_1}(G_j|G_k = 1) + 2p_{k,2}\tilde{\mathbb{E}}_{\ell_2}(G_j|G_k = 2) - 4p_jp_k,$$

- where  $\tilde{\mathbb{E}}_{\ell}(G_j|G_k = m)$  is estimated by sampling  $\ell$  genotypes from individuals with genotype  $m$  at variant  $k$ . The approximate estimator is unbiased and has empirical variance

$$\text{var}_n[\tilde{c}_{jk}(\ell_1, \ell_2)] = \frac{p_{k,1}^2}{\ell_1}\text{var}_n(G_j|G_k = 1) + \frac{4p_{k,2}^2}{\ell_2}\text{var}_n(G_j|G_k = 2).$$

- Supposing that variants  $j$  and  $k$  are independent (which maximizes the variability of the estimator),

$$\text{var}_n[\tilde{c}_{jk}(\ell_1, \ell_2)] = \left( \frac{p_{k,1}^2}{\ell_1} + \frac{4p_{k,2}^2}{\ell_2} \right) s_j^2,$$

- which is minimized by choosing  $\ell_1 : \ell_2$  in proportion to  $p_{k,1} : 2p_{k,2}$ , or in other words oversampling homozygotes by a factor of 2.
- We can now define the Minimax optimal approximate estimator  $\tilde{c}_{jk}^{\ell} = \tilde{c}_{jk}(\ell_1^*, \ell_2^*)$ , where

$$\ell_1^* = \frac{2p_{k,2}}{2p_{k,2} + p_{k,1}}\ell \quad \text{and} \quad \ell_2^* = \frac{p_{k,1}}{2p_{k,2} + p_{k,1}}\ell.$$

- Therefore, the optimal approximate estimator has  $\text{var}_n(\tilde{c}_{jk}^{\ell}) \leq 4p_k^2 s_j^2 / \ell$  (note that  $2p_k = p_{k,1} + 2p_{k,2}$ ), and letting  $\tilde{r}_{\ell} = \tilde{c}_{jk}^{\ell} / s_j s_k$ , we have

$$\text{MSE}(\tilde{r}_{\ell}) - \text{MSE}(r) = \text{var}_n(\tilde{r}_{\ell}) \leq \frac{4p_k^2}{\ell s_k^2} \leq \frac{2}{\ell}.$$

- Here, we have not assumed Hardy-Weinberg Equilibrium (HWE) for either variant. Supposing that both variants are in HWE, we can write  $\mathbb{E}(G_j G_k) = 2p_{jk}(1 + p_j + p_k - p_{jk}) + 2(p_k - p_{jk})(p_j - p_{jk})$ , and because  $p_{jk}$  is the only unknown parameter, the most efficient subsampling estimator would use as many minor-allele homozygotes as possible before sampling any heterozygotes. We avoid this assumption to ensure that estimates are robust.

### Time Complexity of Approximation by Informed Subsampling

- By subsampling  $\ell$  individuals or haplotypes whenever  $\min(MAC_j, MAC_k) > \ell$ , we are guaranteed at most  $\ell$  operations for each pair of variants.
- For computational efficiency, we sample subsets of minor-allele carriers once for each variant as genotype data are processed.

Supplementary Figure 1: Approximate vs. Exact LD Estimates

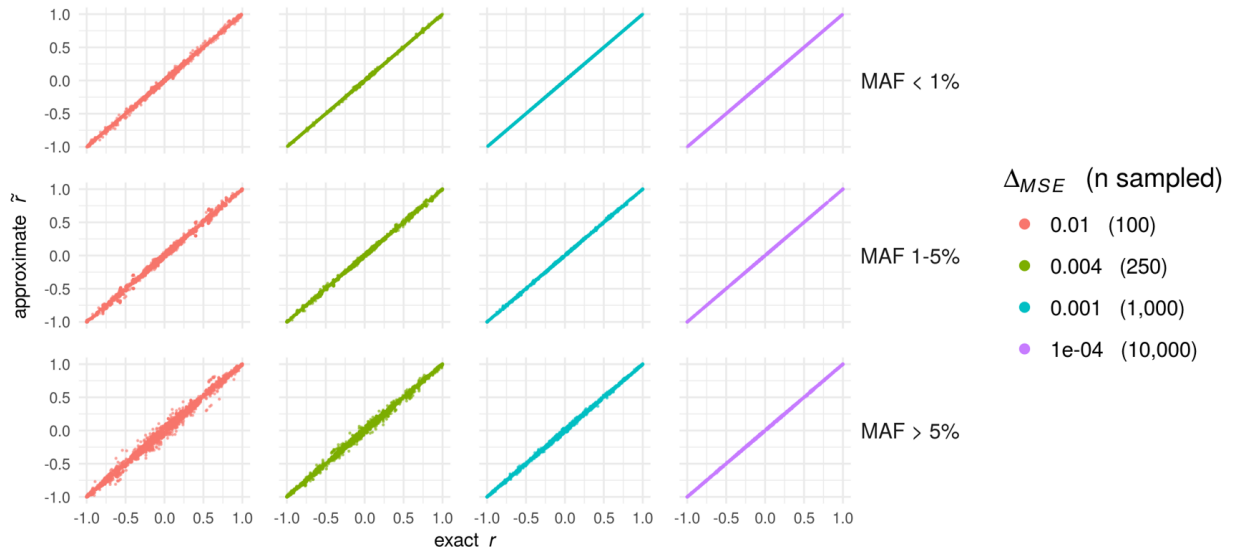

- Here, we show approximate vs. exact LD estimates from the Haplotype Reference Consortium. The number of minor-allele carriers sampled  $\ell$  is equal to  $1/\Delta_{MSE}$ , where  $\Delta_{MSE}$  is the maximum MSE induced by approximation
